# Supplementary material
Source: PubMed Central journal article supplement (PMC3471766)
Supplement: supp_M112.399386_jbc.M112.399386-2.pdf [file supp_M112.399386_jbc.M112.399386-2.pdf]

## Supplemental Table 1: Primer Sequences

### Cloning Primers

---

|                                  |                                                         |
|----------------------------------|---------------------------------------------------------|
| <i>Mkx</i> HD and CD-A           | 5'-CGGCGGT <u>ACCGGT</u> GGGAAAGGTAAGGCATAAGCGACAGGC-3' |
|                                  | 5'-CGGCTCTAG <u>A</u> TTAGCTGCTCACACTCAGCCGTTTC-3'      |
| <i>Mkx</i> locus (-3576 to +127) | 5'-TATCGCTCGAGTGGG CCACAAATAGTCAAACACTTC-3''            |
|                                  | 5'-GATACA <u>AAGCTT</u> GCGGAATCGGCAGCCA-3''            |
| <i>Mkx</i> (aa 1 – 204)          | 5'-TATCGAGGCCTATGAACACCATCGTCTTCAACA-3'                 |
|                                  | 5'-GATACCTCGAGTCTGCCGCCAGCTTTTATC-3'                    |
| <i>VP16</i> domain               | 5'-TATCGCTCGAGACGGCCCCCGACCGAT-3'                       |
|                                  | 5'-GATACTCTAGACTACCCACCGTACTC GTCAATTCCAAG-3'           |

### Genotyping Primers

---

|                   |                                                    |
|-------------------|----------------------------------------------------|
| Common upstream   | 5'-GAGTTCACAG AACCTAG-3'                           |
| Wt downstream     | 5'-TGCTTGTAAGCCACTG-3'                             |
| Mutant downstream | 5'-CTTCTTGACGAGTTCTTCTGAGG-3'                      |
| PCR products      | wild type allele – 680 bp   mutant allele – 371 bp |

### EMSA Primers

---

|            |                                                           |
|------------|-----------------------------------------------------------|
| MRE        | 5' - CTTCTCATGTTTCCCGACTGTCCGGCCCAGCCTACGAACATCCCGCG - 3' |
| Mutant MRE | 5' - CTTCTCAcacTTCCCGACTGTCCGGCCCAGCCTACGAgtgTCCCGCG - 3' |
| Sox6 MBS   | 5' - TCGAGCATGTTCCGGCATCTGATGGAAACATGCCGAG - 3'           |
| Sox6 IBS   | 5' - GGCTACAACATGTGTTTTCTCG - 3'                          |

### Realtime Primers

---

|              |                                |
|--------------|--------------------------------|
| Sox6 Forward | 5' - CATCAAGCGACCAATGAATG - 3' |
| Sox6 Reverse | 5' - TCCTGGTTGGACATGGATTT - 3' |
| Myh1 Forward | 5' - ACAGCAGCGGCTGATCAAT - 3'  |
| Myh1 Reverse | 5' - CCTGGAGAGCTGGGAAACTA - 3' |
| Myh2 Forward | 5' - CCAAGAAAGGTGCCAAGAAG - 3' |
| Myh2 Reverse | 5' - ACCTCACGAAATGAGGATGG - 3' |
| Myh7 Forward | 5' - GGACCTTGGAAGACCAGATG - 3' |
| Myh7 Reverse | 5' - GACAGCTCCCCATTCTCTGT - 3' |
