# Supplementary material
Source: PubMed Central journal article supplement (PMC3471766)
Supplement: supp_M112.399386_jbc.M112.399386-3.pdf [file supp_M112.399386_jbc.M112.399386-3.pdf]

**Supplemental Table 2. Select Putative MBS Sites Located < 5 kb Upstream of Gene Loci**

| <b>Gene Locus</b> | <b>Relative Position<sup>a</sup></b> | <b>MRE Sequence<sup>b,c</sup></b>          |
|-------------------|--------------------------------------|--------------------------------------------|
| Adam4             | -62                                  | aaggATGTTGAACATtttt                        |
| Adam19            | -2696                                | gactATGTCTCACTTGTTCCCTCATGAACATtaag        |
| Adam21            | -614                                 | agtcATGTGAAACACattg                        |
| Akt1              | -336                                 | taccATGTGGATCCCAGGGATCAAACATgggt           |
| Bcl11b            | -48                                  | atggATGTCACGATGCTCCACCGCTCCCCAAACATgtga    |
| Bmp1              | -219                                 | cagaATGTTCTAAAAATCTGACTTTTTTTTAAACATtctc   |
| Ccl2              | -571                                 | acctATGTAAGTGTGGATATGGGTCTGTAACATgagt      |
| Ccl2              | -142                                 | atacATGTGTGGGTATATAACTAATATATAATAAACACatgg |
| Ccl7              | -4545                                | ggttATGTAGAGGCTGTGTCACAACCTAAACACtatt      |
| Cd63              | -512                                 | tcccATGTGTTGAGATAACATgtgt                  |
| Cdc27             | -2717                                | tacgATGTTCTGTCTAACATttat                   |
| Cdc27             | -503                                 | gtccATGTTTAAACATAaaa                       |
| Cdc27             | -268                                 | agtgATGTGTGAGGACCTGAGATCGCTAACAAACATacag   |
| Cxcl5             | -3335                                | acctATGTAGAACACagtt                        |
| Cxcl5             | -335                                 | aaacATGTGGTTGTTTAAACATtgtc                 |
| Daam1             | -169                                 | aaatATGTTGCTATAAACATgtac                   |
| Dlx3              | -423                                 | cctgATGTGGTAAAACATcgaa                     |
| Fgf18             | -2263                                | gggcATGTCCAACACccct                        |
| Foxn1             | -2243                                | tggaATGTGAGGAACACTgtc                      |
| Foxn1             | -1803                                | tgggATGTACTGCTACCAGCCTCCCTTGCAACATatgt     |
| Foxn3             | -1182                                | ttagATGTTTCAATTAGGACCCCCAACATggct          |
| Foxn3             | -115                                 | cagcATGTCACGTGCTGATGAACACcatg              |
| Fst               | -1066                                | gtgtATGTGAAAGAGCAGTTTTTGTATAACACtget       |
| Gdf9              | -557                                 | tagaATGTAGCTGTGAACATgtca                   |
| Gdf11             | -1760                                | tgggATGTTTAGTTTATAAAAATGAACATttat          |
| Gli3              | -3431                                | aaccATGTTGAGGGGGACTGGAACATtact             |
| Gli3              | -2178                                | cattATGTGGTATAATTTGTTCTTGATTGTGAACATtecca  |
| Hdac9             | -3348                                | ttctATGTTGGTTCATTTTAAACATttat              |
| Hdac9             | -2948                                | cctaATGTAAAACATatc                         |
| Hdac9             | -1598                                | tcagATGTAACATgaag                          |
| Hnf1b             | -1333                                | gtatATGTTTGTGTATATTATATATCAACATgtag        |
| Hnf1b             | -583                                 | atggATGTATGTGTCCTGCACCCTCAGGAACACTgtg      |
| Hoxb7             | -999                                 | ccatATGTTCCGTCACACAGGCCCAAAACACAact        |
| Hoxb2             | -1066                                | aaatATGTCCACAGGCAGTGTTTAAACATetta          |
| Hoxb2             | -59                                  | acacATGTGGTACACAGACATACATTCAGGCAAACATtc    |
| Ifng              | -2229                                | gacaATGTCCTGAAACACagga                     |
| Ifng              | -2059                                | caacATGTTTTAGGAACACacac                    |
| Igf1              | -5081                                | tgaatATGTGACATTGCTCTAACATctcc              |
| Il3               | -4276                                | agttATGTCTTGTTTTTATTTGTTTGGACCTAACATgaag   |
| Il3               | -4224                                | ctgaATGTCTATATTTCCCCTCCCTAGGAACATgttg      |
| Il9               | -1422                                | agtcATGTGCACATGCCACATGCAAACAAACACacct      |
| Il9               | -67                                  | atcATGTGCCAATCCTTACATAACACccat             |
| Ins2              | -4662                                | acatATGTAAACATggca                         |
| Itga3             | -3165                                | tgggATGTAACAGAAAAAGTCACTAAACAAGAACACcccc   |
| Itga3             | -1910                                | cgagATGTGTAACAGCAACACTgac                  |

|           |       |                                            |
|-----------|-------|--------------------------------------------|
| Itga3     | -1047 | atatATGTTATATTATATAACACacat                |
| Lhx1      | -955  | agggATGTGACCGAAGTCCCAACACcgtt              |
| Lhx1      | -2463 | agggATGTGACCGAAGTCCCAACACcgtt              |
| Max       | -3139 | agaaATGTTAAAATACTTGAAACACagat              |
| Max       | -991  | gaaaATGTTCTGTGGGCCTAACATgaaa               |
| Meis1     | -3759 | gtccATGTGTATGTTTCAGCTGTAAAAGGCAACACaagc    |
| Meox2     | -1404 | agcaATGTTAGTAAAGCCAACATctgc                |
| Meox2     | -407  | acttATGTAAACATtcat                         |
| Mmp2      | -309  | ggcaATGTGGACCTGGGGGTAAGTAAGGGAAACATtctg    |
| Mmp3      | -1661 | aggcATGTCATGCTTTAATTTTATAAAACCTATAACATcttt |
| Mmp13     | -93   | caacATGTGAGCTGTGGAAAAGTTATAAACATgtga       |
| Mmp28     | -1895 | ctctATGTATTTACATATTCTGAACATtctg            |
| Mmp28     | -1678 | taaaATGTGGTATTTGTGGAGTTGGGGAGTTTGAACATttct |
| Myf5      | -2443 | aaaaATGTAAATTTCCCCATAAATAACATtgaa          |
| Myf5      | -529  | gaaaATGTAATGAAGCTTTCATTTAAAAGTAATAACACtgac |
| Myocardin | -2350 | cagaATGTTTACATCTGTGAACATgttt               |
| Myogenin  | -4062 | taggATGTCTATGGTAACATtcta                   |
| Myogenin  | -167  | tagcATGTTCATGGAGCTGAAACATgttg              |
| Myom1     | -2942 | atccATGTCAATATTATGTCTAACATggta             |
| Myom1     | -2808 | attgATGTACTTAAACATttat                     |
| Myom1     | -519  | tactATGTTATAAAAACACatta                    |
| Notch1    | -1037 | tacaATGTTACAGGTCTATCAGCAACAGAACATctga      |
| Notch1    | -50   | caggATGTCCAAACATcaag                       |
| Numb      | -3022 | caaaATGTCATTTTCAGAAAACACccaa               |
| Pbx2      | -1372 | tcagATGTCTCTCTTAAATCTACAACCTAACACcagt      |
| Pcdh9     | -635  | gaaaATGTTAACATAaag                         |
| Pcdh9     | -248  | tgcaATGTTATTATGACATGTGGAACACataa           |
| Prr6      | -3188 | acgtATGTTAAATACACTAACATttgg                |
| Psen1     | -3432 | cttcATGTCATGGTGGCCCCAATCATAACATtatt        |
| Psen1     | -478  | gtgtATGTAACACaata                          |
| Rock2     | -1536 | cctgATGTGTTTTACTTAACTAACATgtat             |
| Six4      | -831  | caaaATGTCTTCAAACATtgtg                     |
| Six6      | -2529 | gaaaATGTATGCATGTGTATACATAAACATatgc         |
| Six6      | -643  | tcaaATGTCTGAAACAGATGGAAACACccac            |
| Six6      | -406  | tttcATGTTGAAATCTTGGGGCCACCAACATtgtt        |
| Smad5     | -3378 | acacATGTGGTAGTTTAAACCCAAAACACatgt          |
| Smad5     | -1676 | ggagATGTTACCAGTTCAGTTCTCTAAGTGCTAAACATgagc |
| Sox4      | -1239 | gtgtATGTATGTTTAAATAAACATgaca               |
| Sox9      | -311  | gtggATGTGTGCGTGTGTTGTGACACGGGACAACACatgc   |
| Sparc     | -3810 | gggaATGTGGAGCAAGAAGAAAGAACTGGAAACATtcaa    |
| Sparc     | -1890 | tggtATGTCTTCTCATCCTAACATcttg               |
| Tbx4      | -1324 | atacATGTGAGAACTGCATTTTTCTCCCAAACACagat     |
| Tcf7      | -414  | catcATGTGTTGTGTGTAATTTTTAAAACACataa        |
| Tnfsf13   | -1569 | agagATGTGACTACAGGGTTAAGTGACATAACACcaac     |
| Wnt5a     | -1345 | agggATGTGGAGAGGAACACctgt                   |

<sup>a</sup> the position of the MRE is defined by setting the reported transcriptional start site as +1

<sup>b</sup> potential MRE are identified using ATGTN{0,25}AACAY as a query using Regulatory Sequence Analysis Tools (<http://rsat.ulb.ac.be>).

<sup>c</sup> the MRE and spacer sequence are capitalized
